# Supplementary material
Source: Springer Nature journal article supplement (https://www.springermedizin.de/resource/supplementary/13231_2013_78_MOESM4_ESM.pdf/9676500)

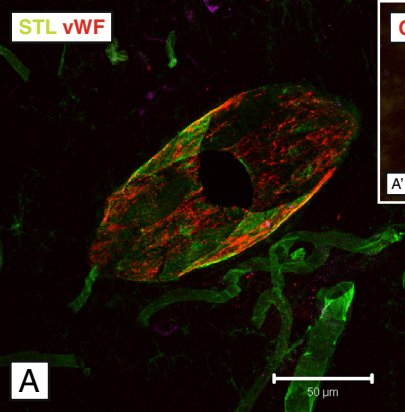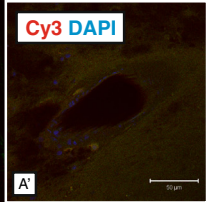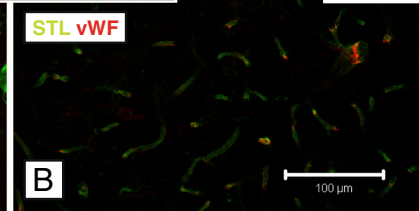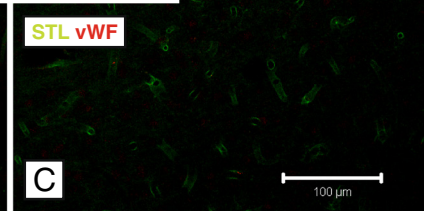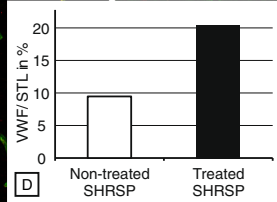

Supplement: MOESM4 [file 9676500]
